# Supplementary material for: Improving the cytotoxic response of tumor-infiltrating lymphocytes towards advanced stage ovarian cancer with an oncolytic adenovirus expressing a human vIL-2 cytokine
Source: PubMed Central journal article supplement (PMC10645590; doi:10.1038/s41417-023-00658-3), 2023-09-04
Supplement: 41417_2023_658_MOESM1_ESM.pdf [file 41417_2023_658_MOESM1_ESM.pdf]

## Improving the cytotoxic response of tumor-infiltrating lymphocytes towards advanced stage ovarian cancer with an oncolytic adenovirus expressing a human vIL-2 cytokine

Quixabeira DCA<sup>1,2</sup>, Jirovec E<sup>1</sup>, Pakola S<sup>1</sup>, Havunen R<sup>1,2</sup>, Basnet S<sup>1</sup>, Santos JM<sup>1,2</sup>, Kudling TV<sup>1</sup>, Clubb JHA<sup>1,2</sup>, Haybout L<sup>1</sup>, Arias V<sup>1</sup>, Grönberg-Vähä-Koskela S<sup>1,3</sup>, Cervera-Carrascon V<sup>1,2</sup>, Pasanen A<sup>4</sup>, Anttila M<sup>5</sup>, Tapper J<sup>6</sup>, Kanerva A<sup>6</sup>, and Hemminki A<sup>1,2,3\*</sup>

### Supplements

| Supplementary Table 1- Flow cytometry panel |            |          |                  |           |
|---------------------------------------------|------------|----------|------------------|-----------|
| Antigen                                     | Fluochrome | Clone    | Catalogue Number | Provider  |
| CD3                                         | AF700      | SK7      | 344822           | Biolegend |
| CD4                                         | BV570      | RPA-T4   | 300534           | Biolegend |
| CD8                                         | BV510      | RPA-T8   | 563256           | BD        |
| PD-1                                        | APC-Cy7    | EH12.2H7 | 329922           | Biolegend |
| CD25                                        | BV711      | M-A251   | 356138           | Biolegend |
| FoxP3                                       | PE-Dazzle  | 206D     | 320126           | Biolegend |
| GrzmB                                       | PE         | GB11     | 561142           | BD        |
| EpCam                                       | PE-Dazzle  | 9C4      | 324232           | Biolegend |
| CD56                                        | BV510      | HCD56    | 318340           | Biolegend |

**Supplementary Table 1.** List of Antibodies and fluorochromes used for the immune cells studies.

| Supplementary Table 2- IHC antibody panel |               |             |
|-------------------------------------------|---------------|-------------|
| Antibody                                  | Dilution used | Provider    |
| CD4 (104R-16)                             | 1:100         | Cell Marque |
| CD8 (NCL-CD8-4B11)                        | 1:50          | N-C         |
| CD56 (156R-96)                            | 1:500         | Cell Marque |
| PD-L1 (741-4860)                          | Ready to use  | Roche       |

**Supplementary Table 2.** List of antibodies used for the immunohistochemistry staining of OvCa slides.
